# Supplementary material for: High-dose intranasal application of titanium dioxide nanoparticles induces the systemic uptakes and allergic airway inflammation in asthmatic mice
Source: Respir Res. 2020 Jul 2;21:168. doi: 10.1186/s12931-020-01386-0 (PMC7331175; doi:10.1186/s12931-020-01386-0)
Supplement: Supplementary file 1 — Additional file 1. [file 12931_2020_1386_MOESM1_ESM.doc]

**Supplementary Information**

High-dose intranasal application of titanium dioxide nanoparticles induces the systemic uptakes and allergic airway inflammation in asthmatic mice

Shaza Abdulnasser Harfoush1, Matthias Hannig2, Duc Dung Le3, Sebastian Heck1, Maximilian Leitner1, Albert J. Omlor1,7, Isabella Tavernaro4, Annette Kraegeloh4, Ralf Kautenburger5, Guido Kickelbick5, Andreas Beilhack3, Markus Bischoff 6, Juliane Nguyen7, Martina Sester8, Robert Bals9and Quoc Thai Dinh1,9


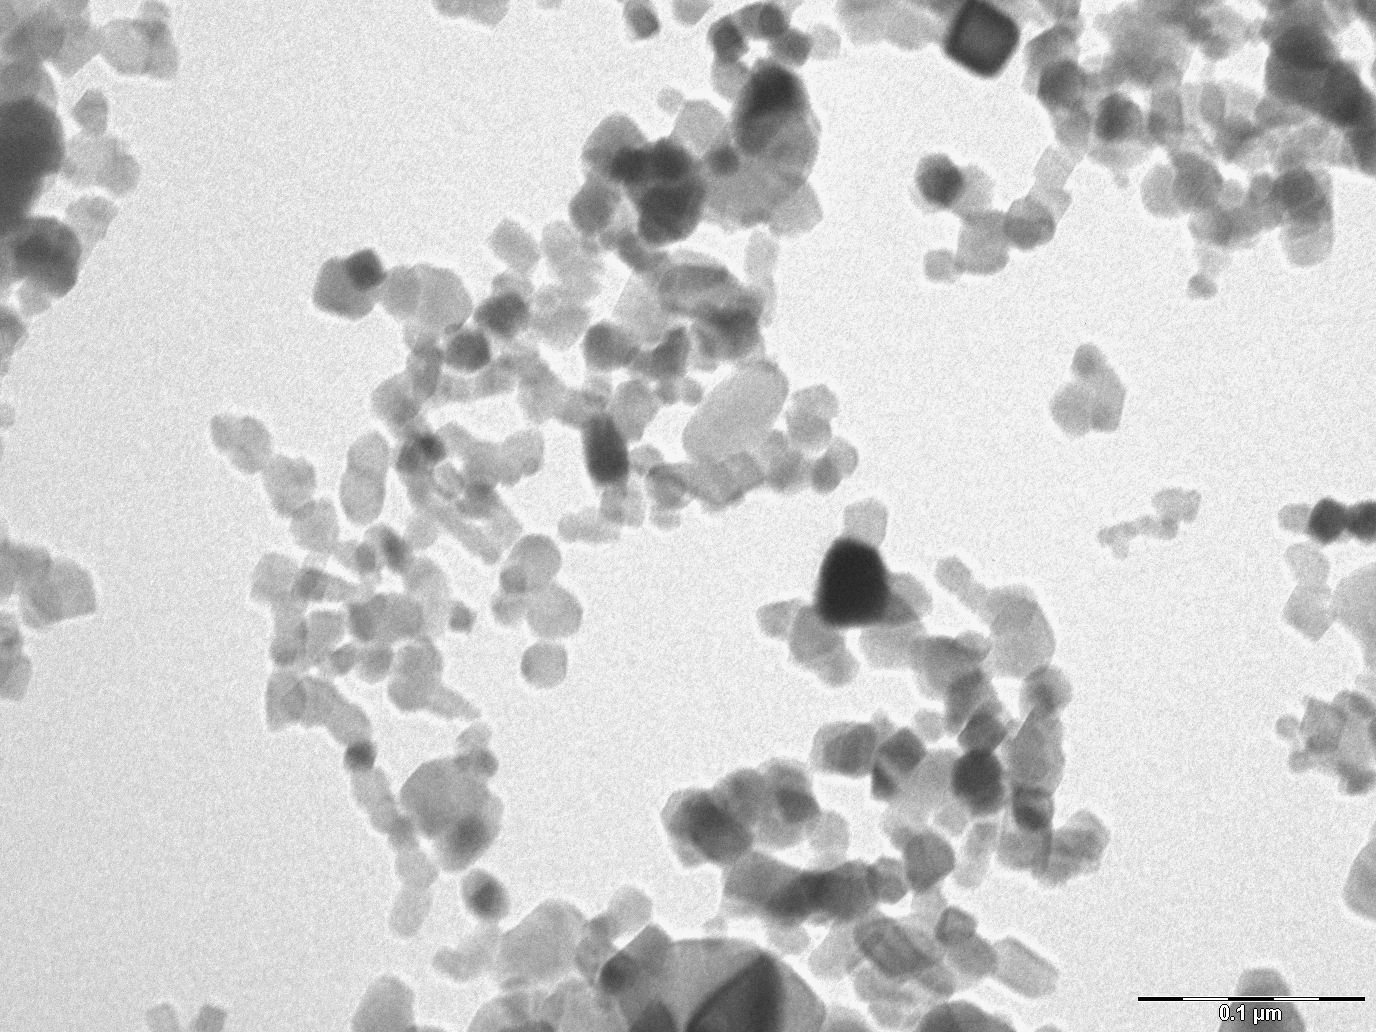


**Fig. S1.** Transmission electron microscopy image of titanium dioxide nanoparticles (TiO2 NPs; The NPs had a core diameter of approximately 21 nm. Results revealed that the majority of TiO2 NPs were spherical and tended to create relatively soft-bonded agglomerates.)


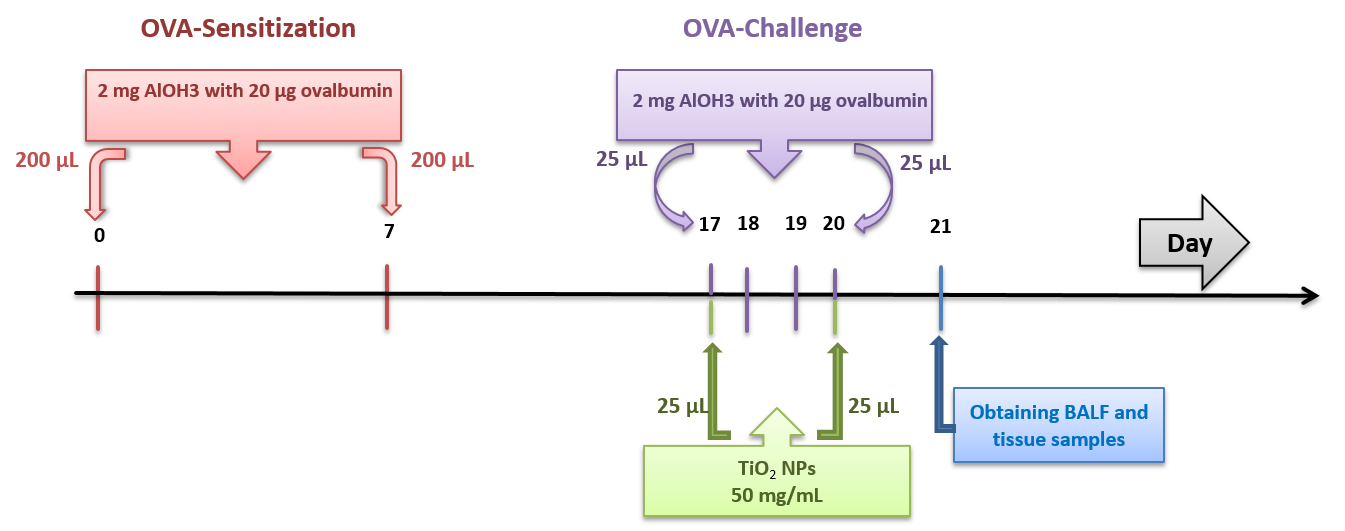


**Fig. S2.** Sensitization and challenge procedures in the mice.

Mice in the control groups received an intraperitoneal injection of 200 µl PBS or aluminum hydroxide-adsorbed ovalbumin (OVA; 2 mg AlOH3 with 20 µg OVA) on days 0 and 7. On days 17, 18, 19, and 20, the mice received intranasally 25 µl OVA for OVA challenge. In the NPs groups, each of the BALB/c mice was treated intranasally with 25 µl TiO2 NPs suspension (50 mg/mL) 1 h after OVA exposure on days 17 and 20. Day 21 was defined as the final study endpoint. Airway resistance measurements were monitored in terms of methacholine-induced specific airway resistance. The bronchoalveolar lavage fluid was collected for cell counting, and tissue samples were isolated for histologic analysis.


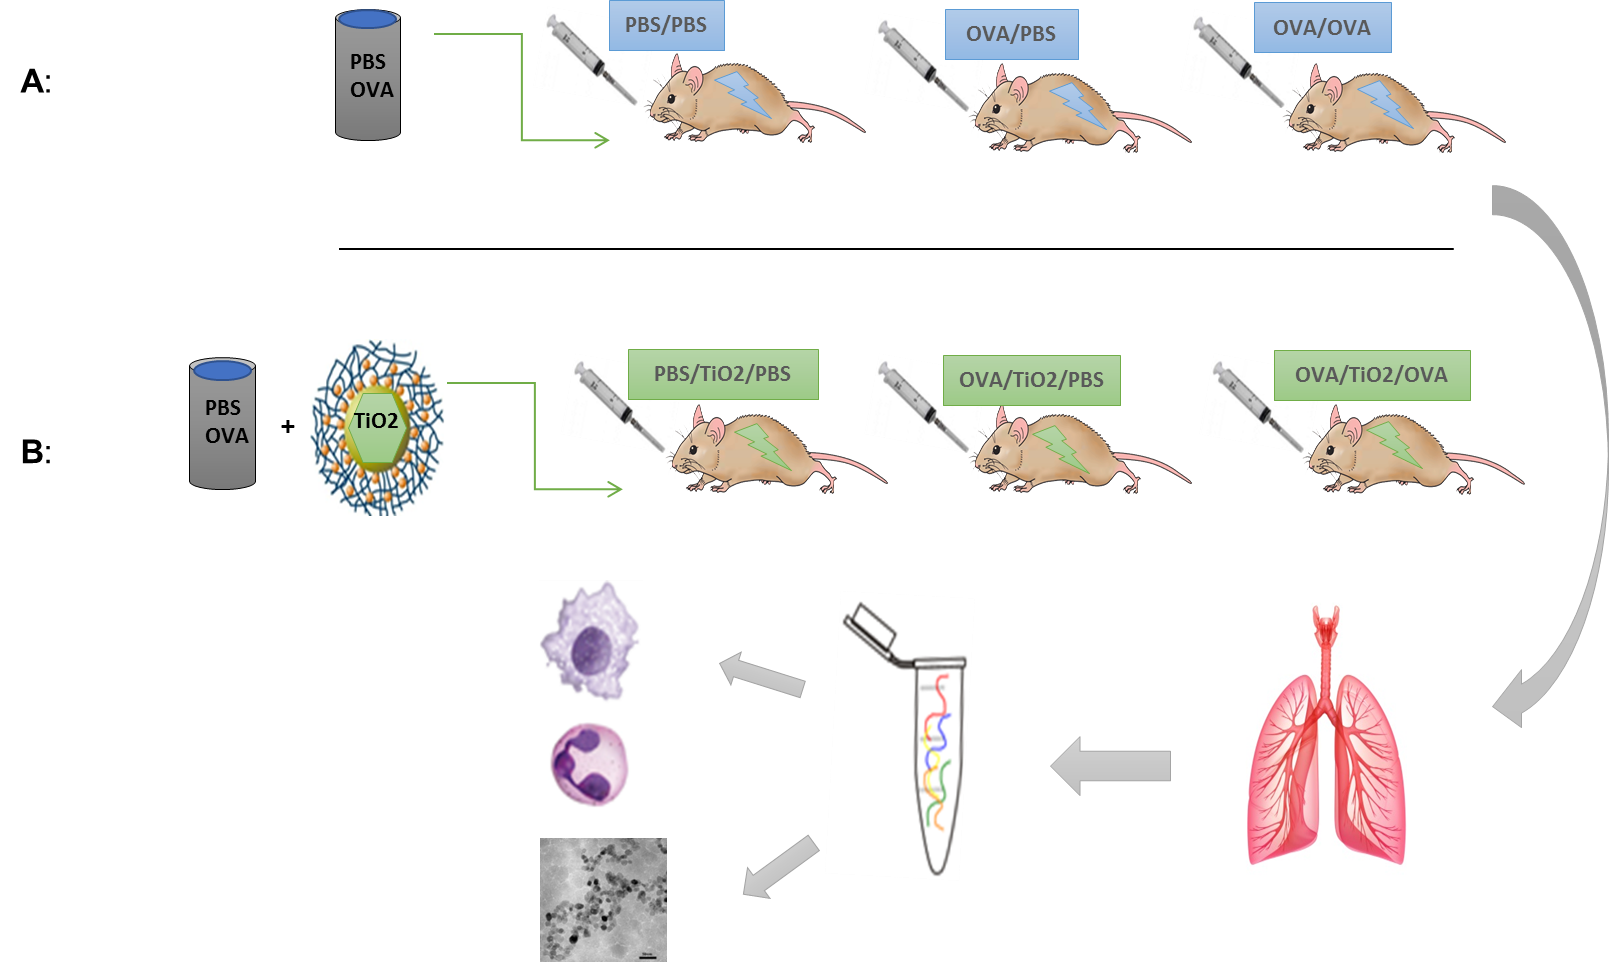


**Fig. S3.** Investigation of BALB/c female (9-week-old) mice in six test groups.

Mice in the phosphate-buffered saline [PBS]/PBS group were neither sensitized nor challenged and therefore had no asthma [**A**]. However, those in the ovalbumin [OVA]/PBS group were sensitized to OVA but not challenged and therefore had no asthma [**A**]. The first two categories together define the non-asthmatic or control status. Mice in the third group with OVA/OVA were both sensitized and challenged with OVA and therefore had asthmatic reactions [**A**]. In [**B**], we applied titanium dioxide nanoparticles [TiO2 NPs] in combination with the previous treatment to the mice. Three new groups receiving NPs were defined as PBS/TiO2/PBS, OVA/TiO2/PBS, and OVA/TiO2/OVA [**B**]. Each of the first three groups consisted of 5 mice. Each of the second three groups was composed of 10 mice.


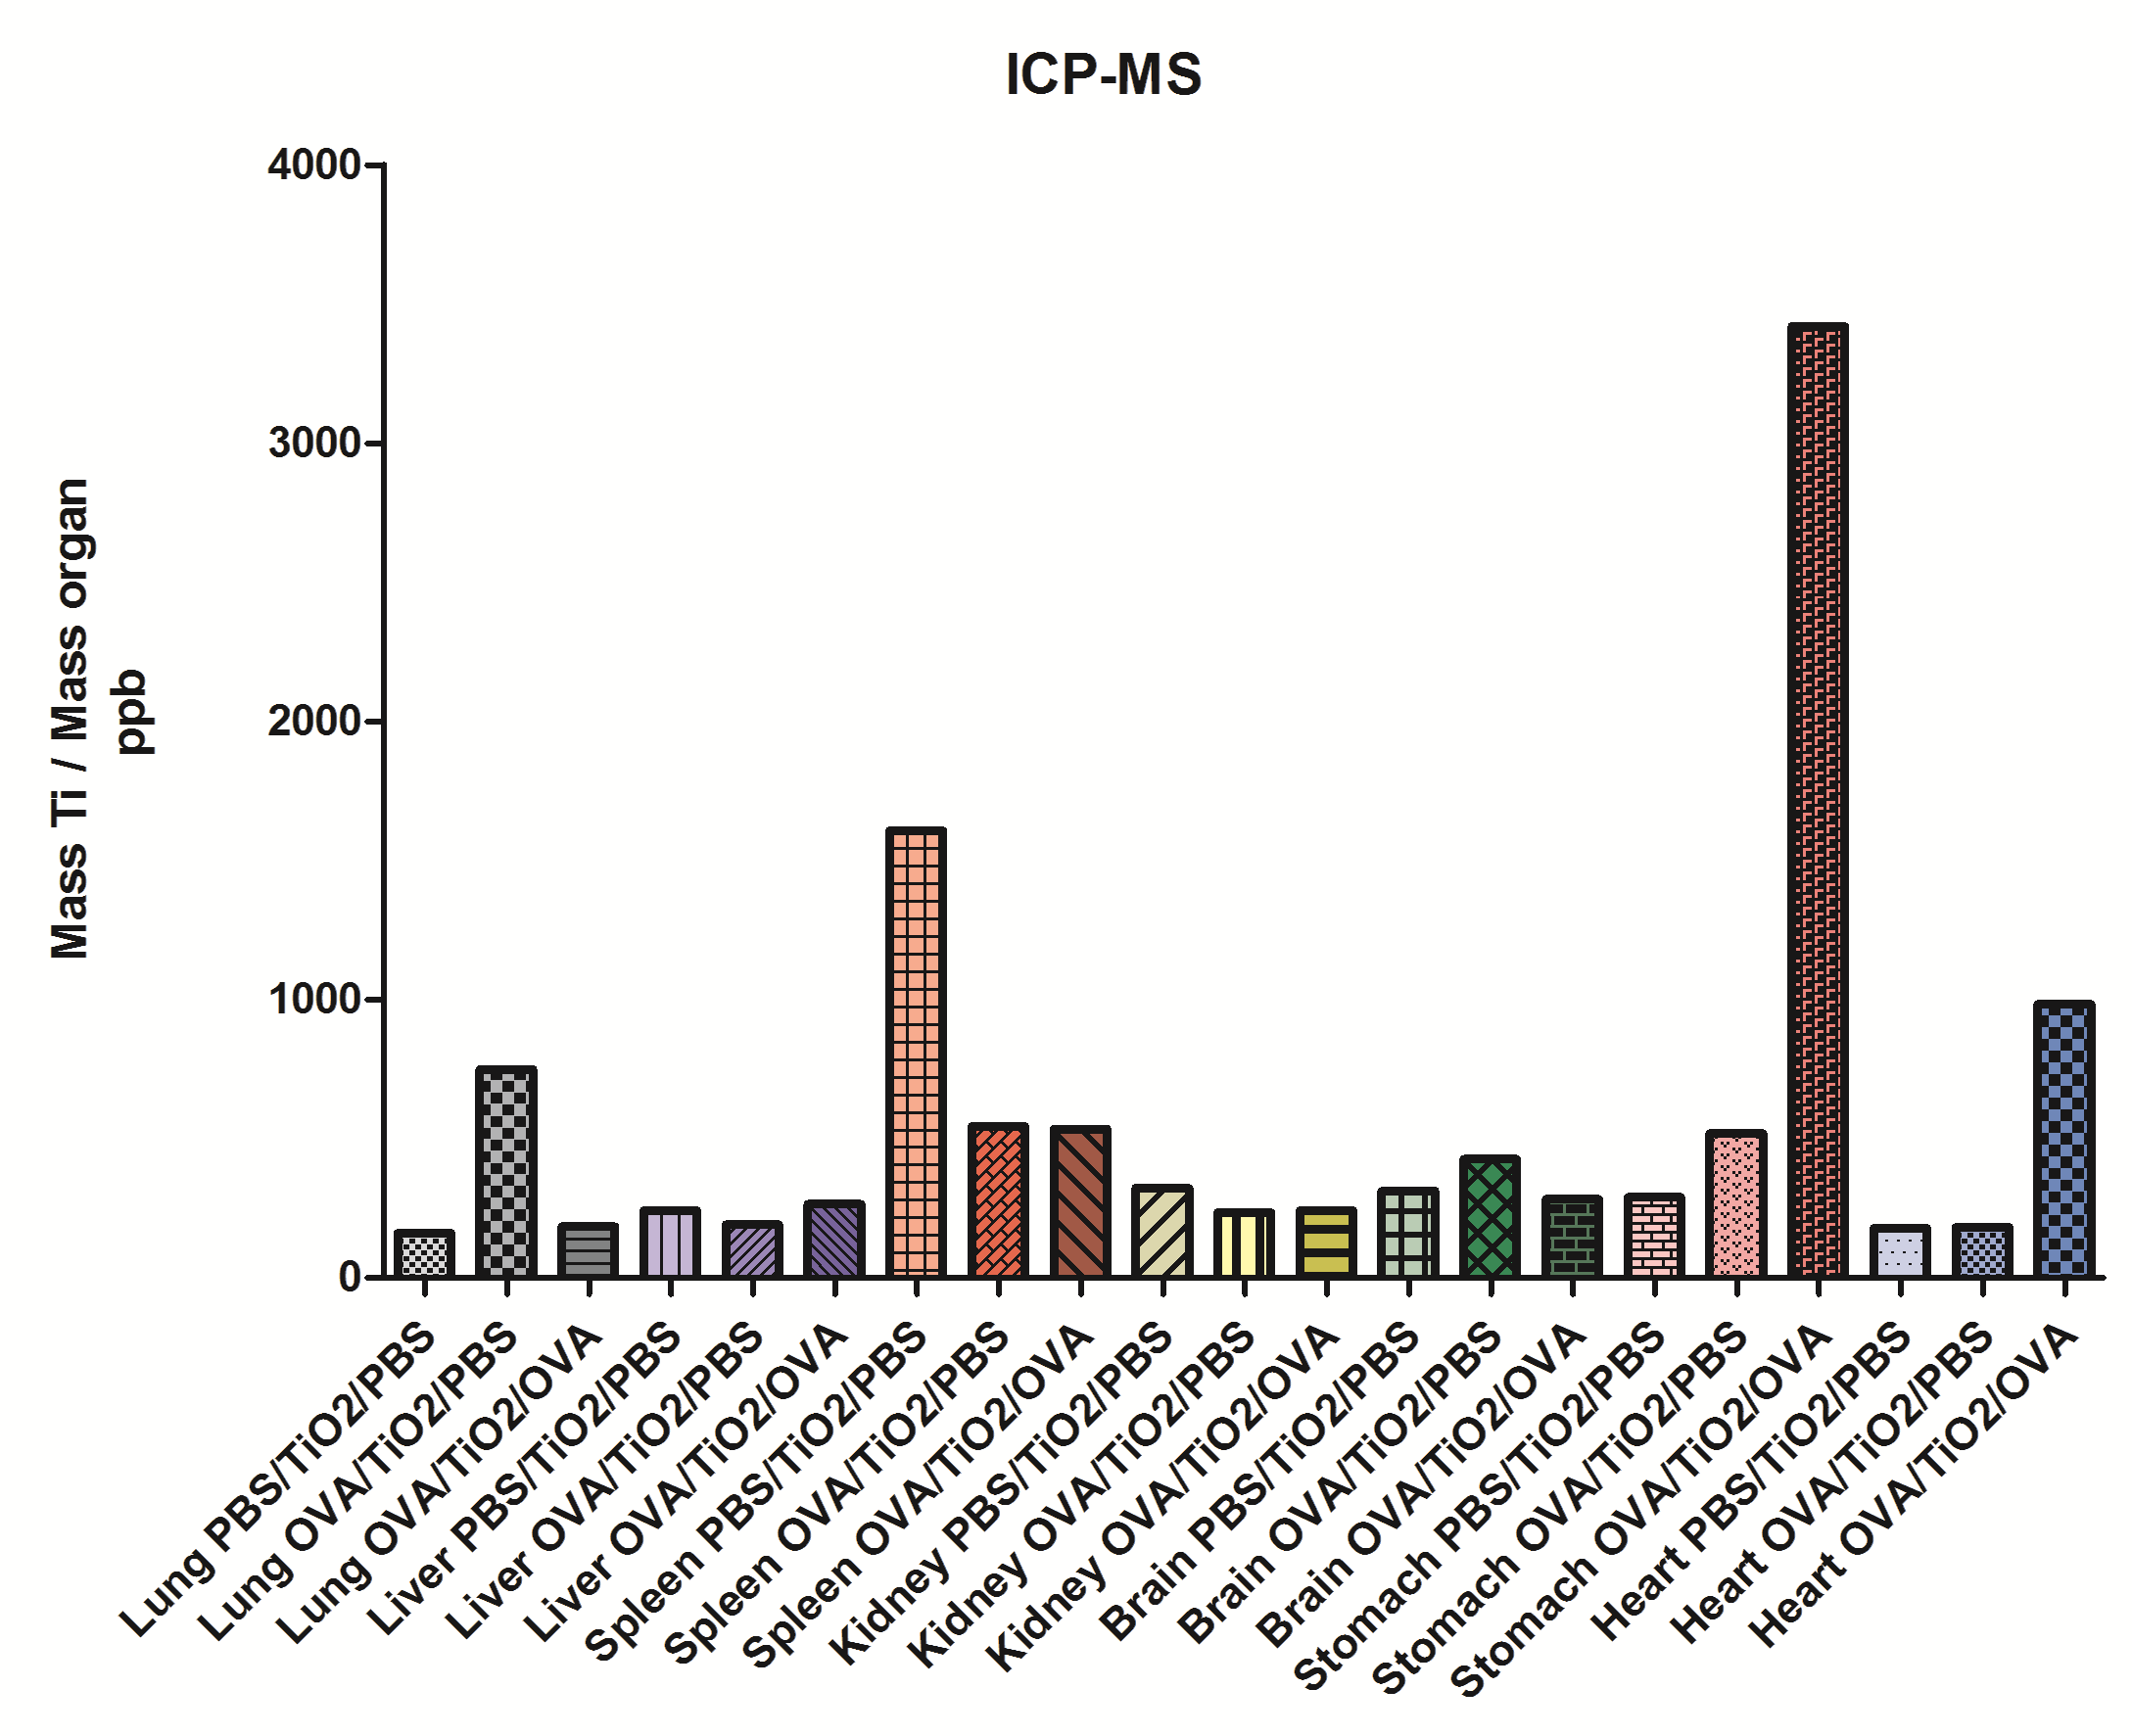


**Fig. S4.** Inductively coupled plasma mass spectrometry of different organs showed the traces of TiO2 NP in the heart, lung, brain, stomach, and kidney of the treated mice expressed as mass Ti/mass organ in ppb.
